# Supplementary material for: Erinacine S from Hericium erinaceus mycelium promotes neuronal regeneration by inducing neurosteroids accumulation
Source: PubMed Central journal article supplement — J Food Drug Anal. 2023 Mar 15;31(1):32–54. doi: 10.38212/2224-6614.3446 (PMC10208670; doi:10.38212/2224-6614.3446), 2023-03-15
Supplement: JFDA-31-01-032-s001.pdf [file JFDA-31-01-032-s001.pdf]

- Erinacine S derived from the mycelium of *Hericium erinaceus* promotes neurite outgrowth of primary neurons from both the central (CNS) and peripheral nervous systems (PNS).
- Erinacine S promotes the regeneration of CNS neurons on inhibitory substrates (chondroitin sulfate proteoglycans) that mimic the CNS injury condition.
- Erinacine S enhances the regeneration of PNS axons after they were physically severed.
- Erinacine S facilitates the accumulation of neurosteroids in neurons.
